# Supplementary material for: Antimicrobial Activity of Grapefruit Seed Extract on Edible Mushrooms Contaminations: Efficacy in Preventing Pseudomonas spp. in Pleurotus eryngii
Source: MDPI journal article supplement (doi:10.3390/foods13081161), 2024-04-11
Supplement: s1 [file s1]

## Supplemental Materials

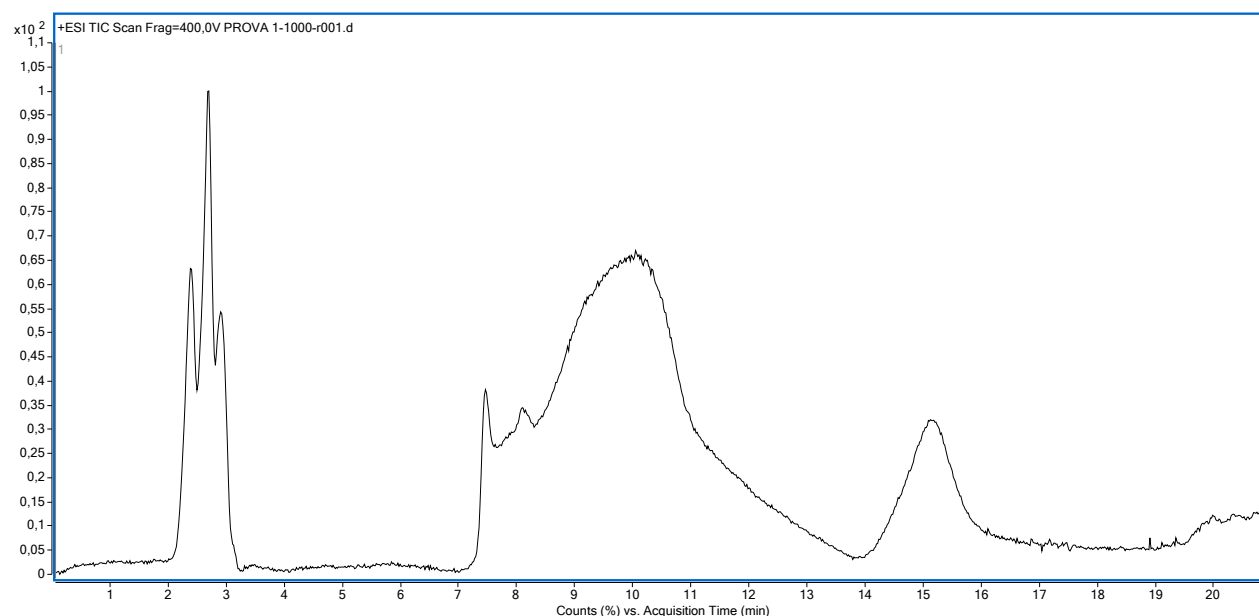

**Supplementary Figure S1.** HPLC-Qtof/MS chromatogram of GSE.

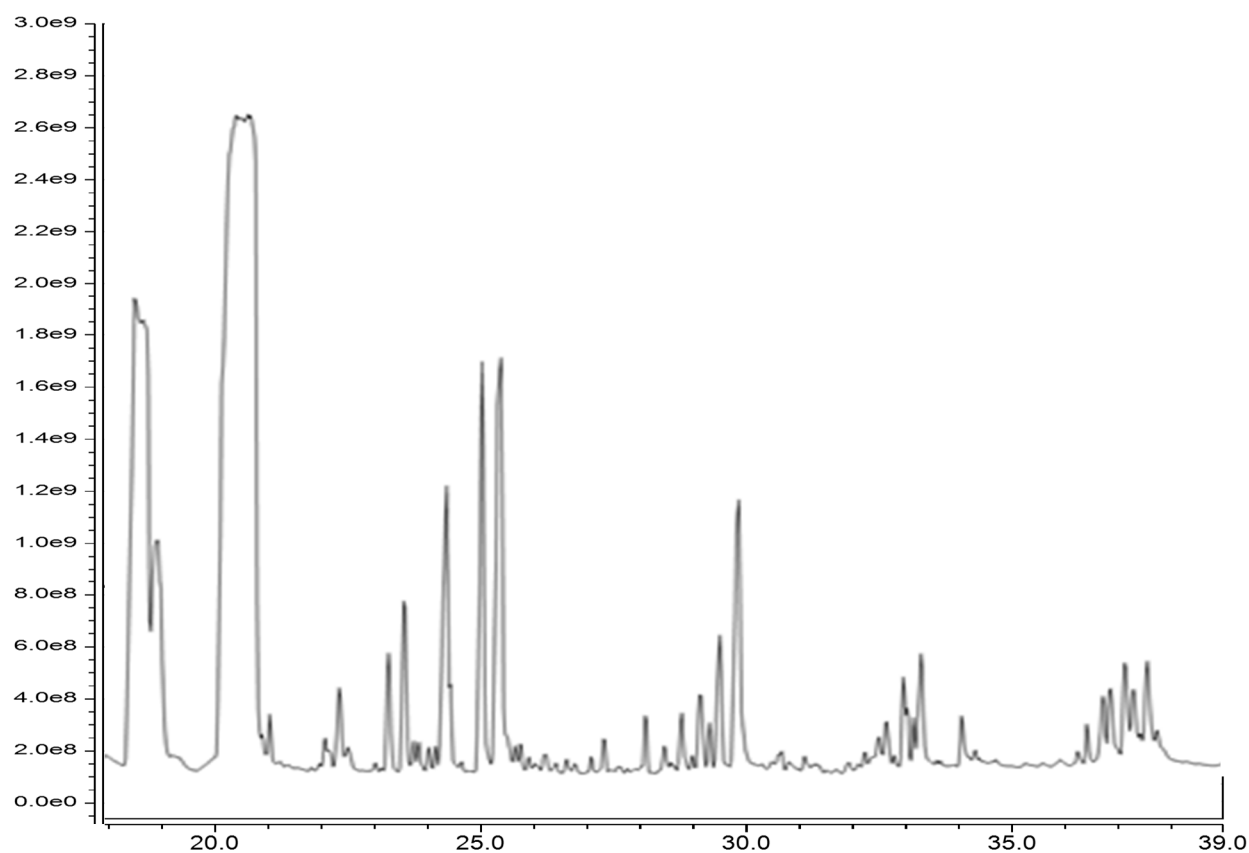

**Supplementary Figure S2.** GC-MS chromatogram of GSE.
